# Supplementary material for: Transfer of assembled collagen fibrils to flexible substrates for mechanically tunable contact guidance cues
Source: Royal Society of Chemistry journal article supplement (doi:10.1039/c8ib00127h), 2018-01-01
Supplement: c8ib00127h1.pdf [file c8ib00127h1.pdf]

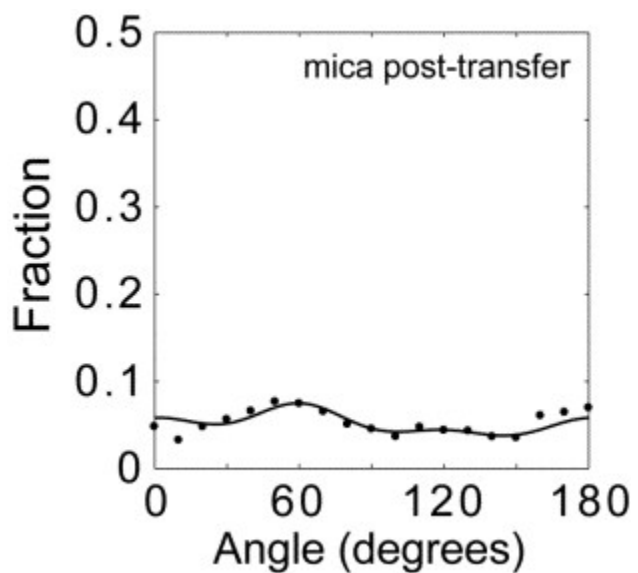

1

- 2 **Supplementary Figure 1: Angle distribution of collagen on the mica post-transfer substrates.** The  
3 fraction of ROIs with different angles is shown in solid circles fit with a three peak von Mises distribution.  
4 Multiple images ( $N_{images} = 3$ ) were compiled from several samples ( $N_{samples} = 3$ )
